# Supplementary material
Source: PubMed Central journal article supplement (PMC3094750)

Fig S1.

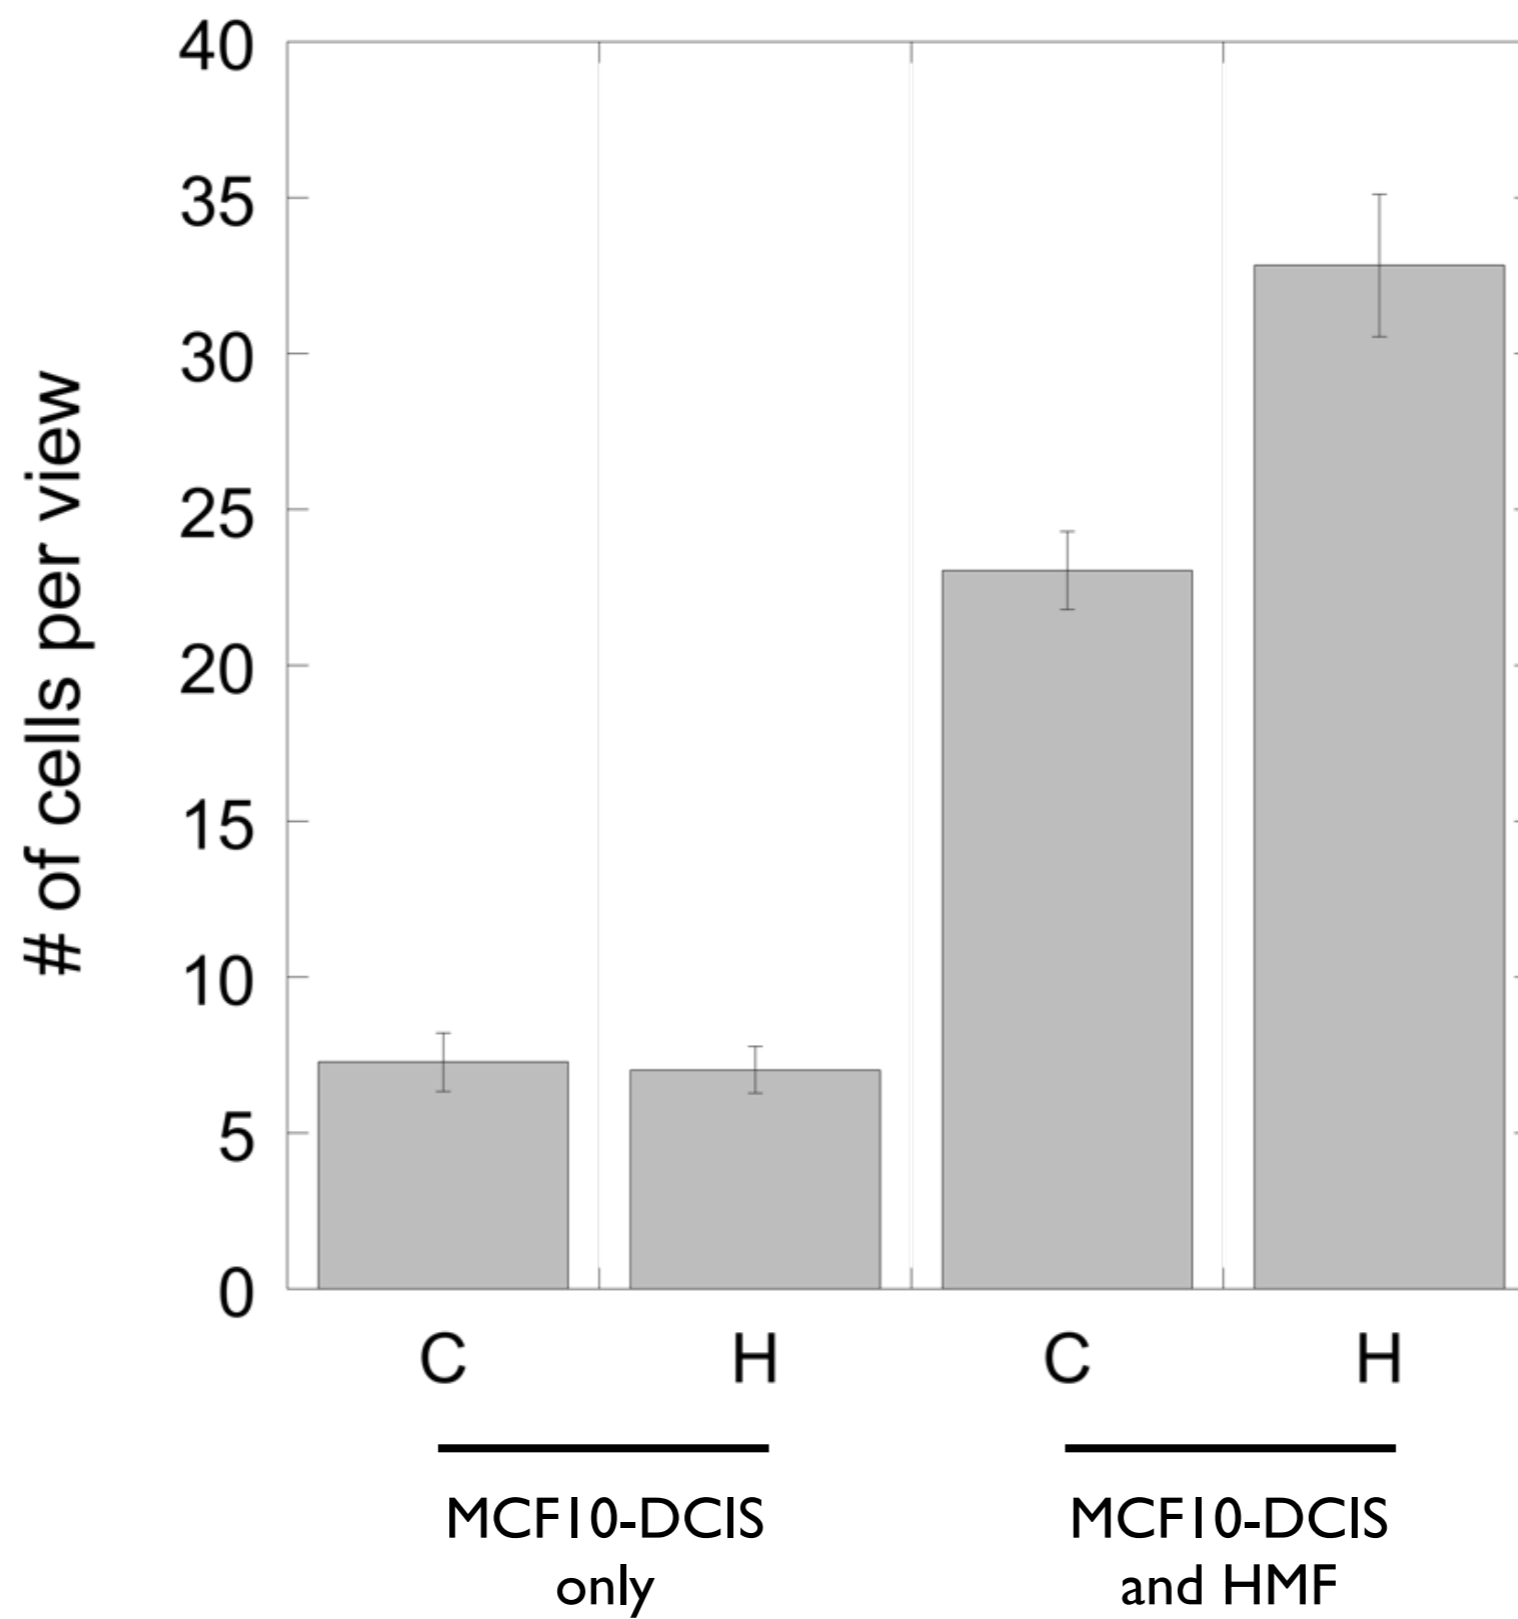

Fig S2.

## Collagen I

## Matrigel

Day 1

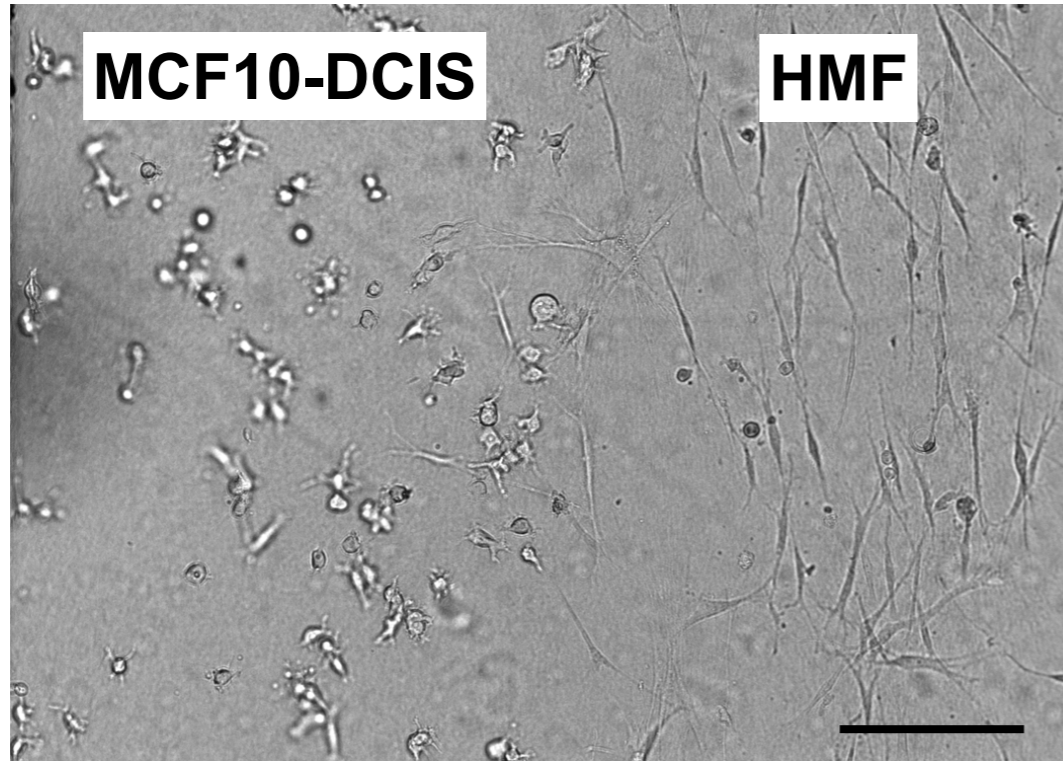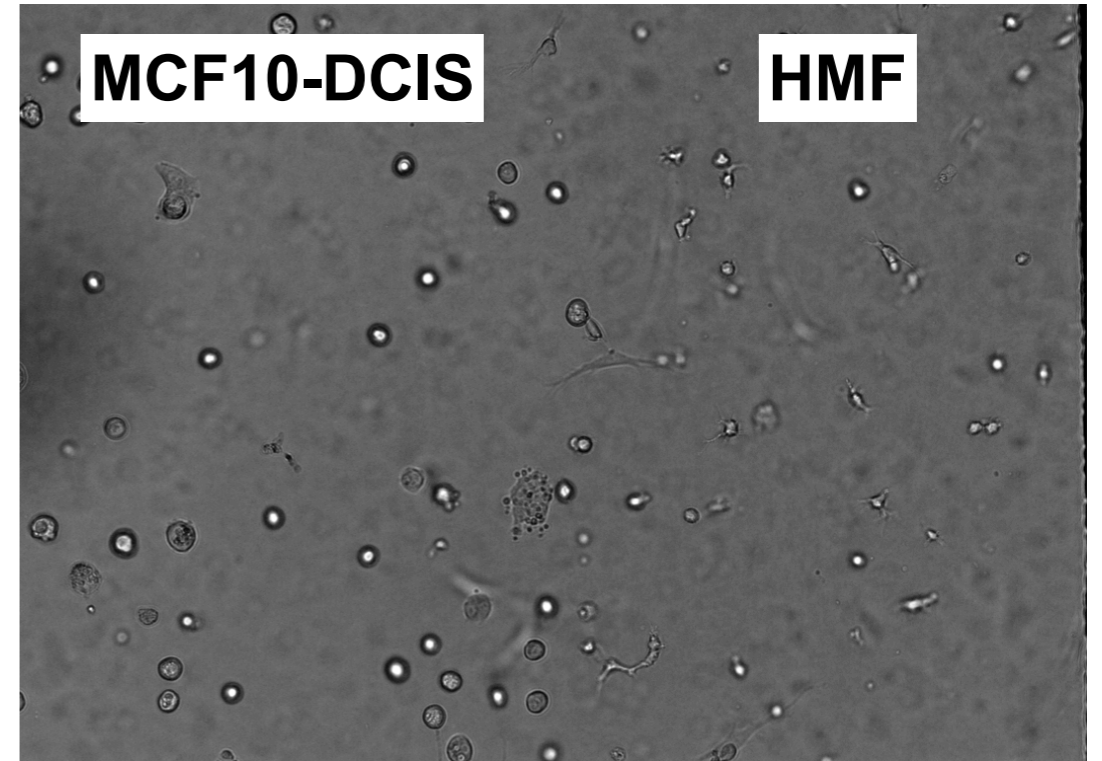

Day 7

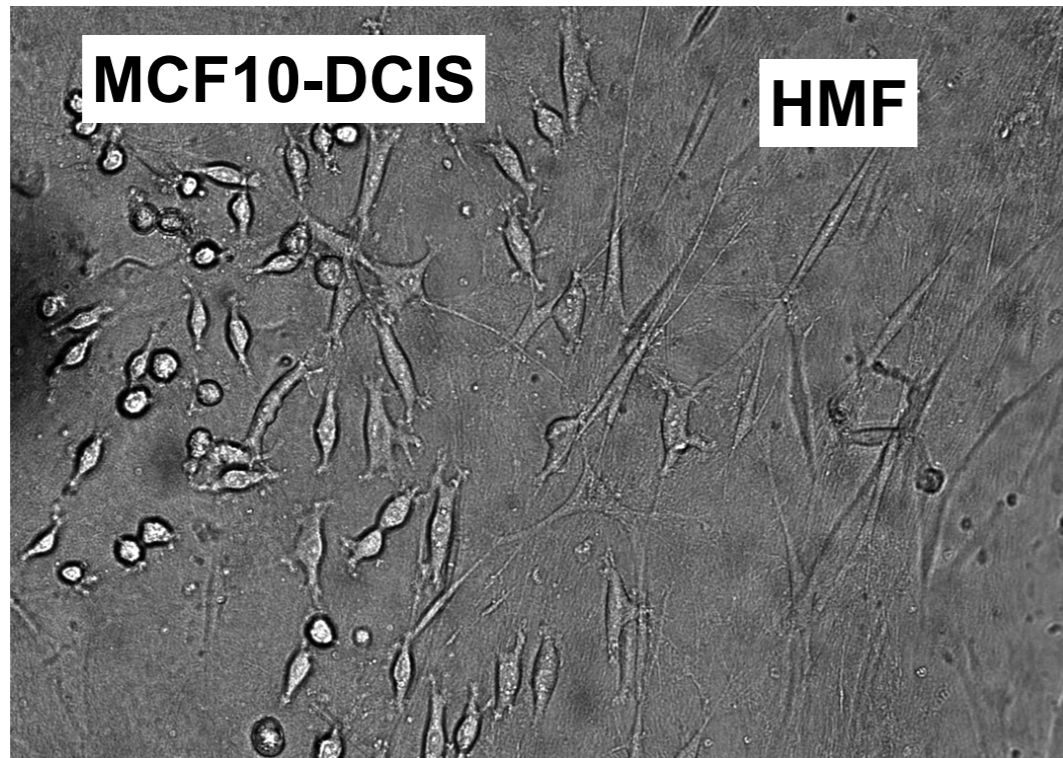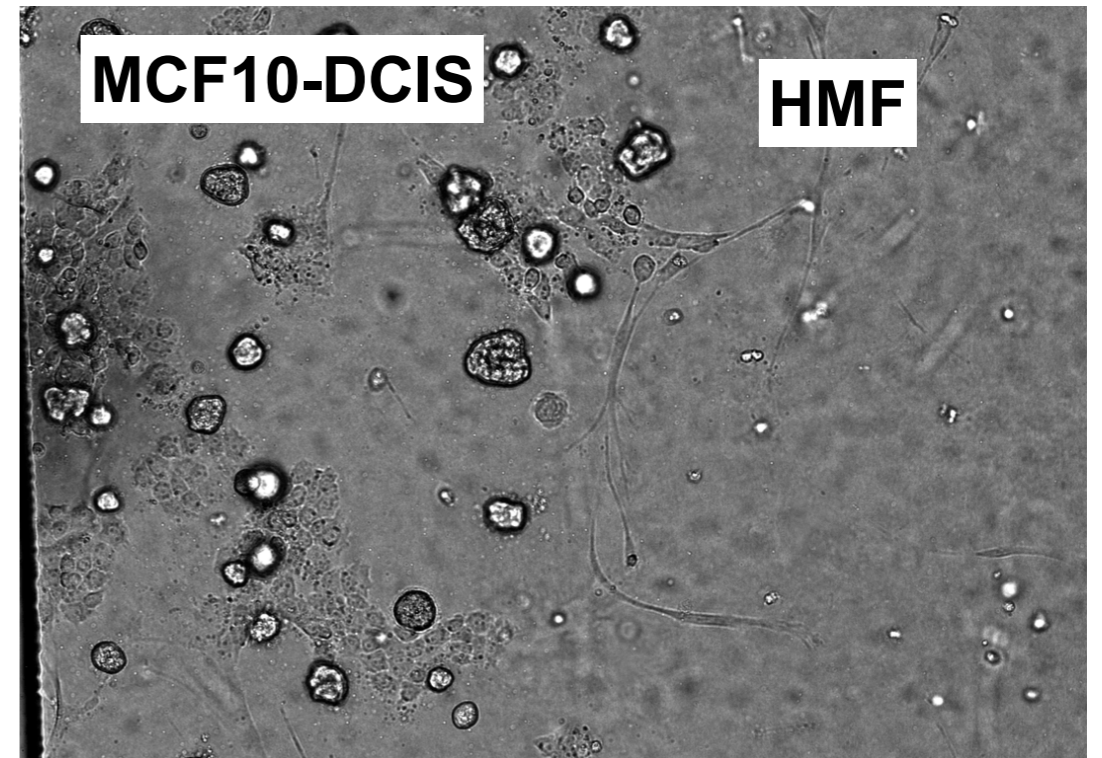

Fig S3.

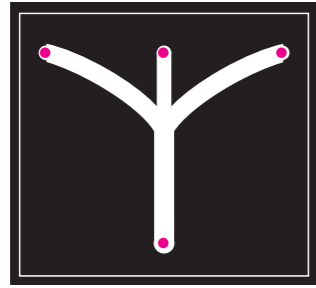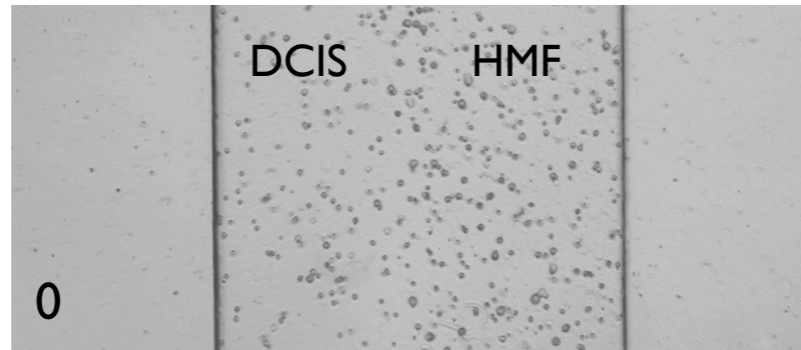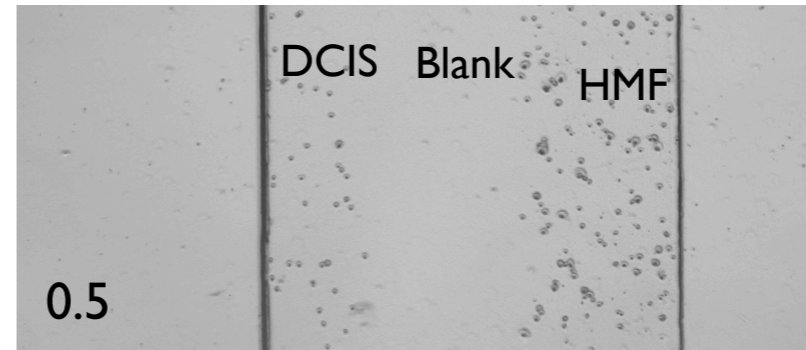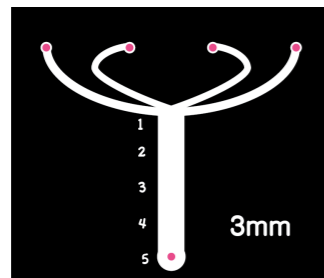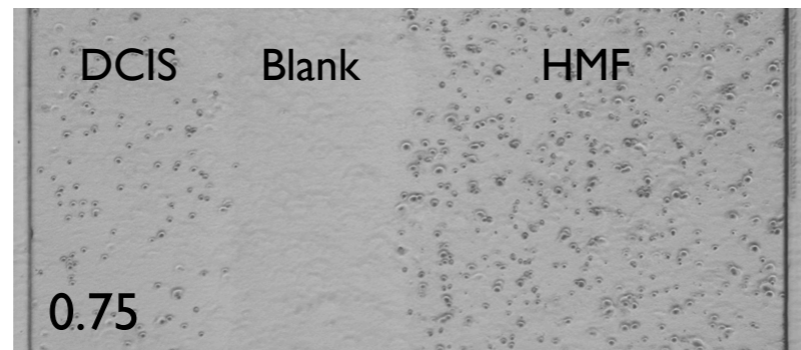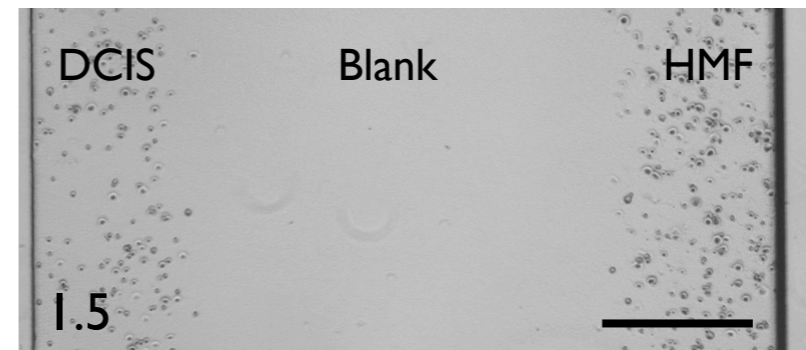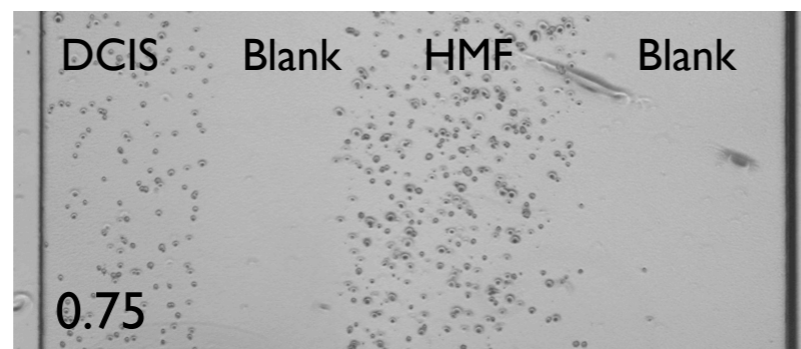

Fig S4.

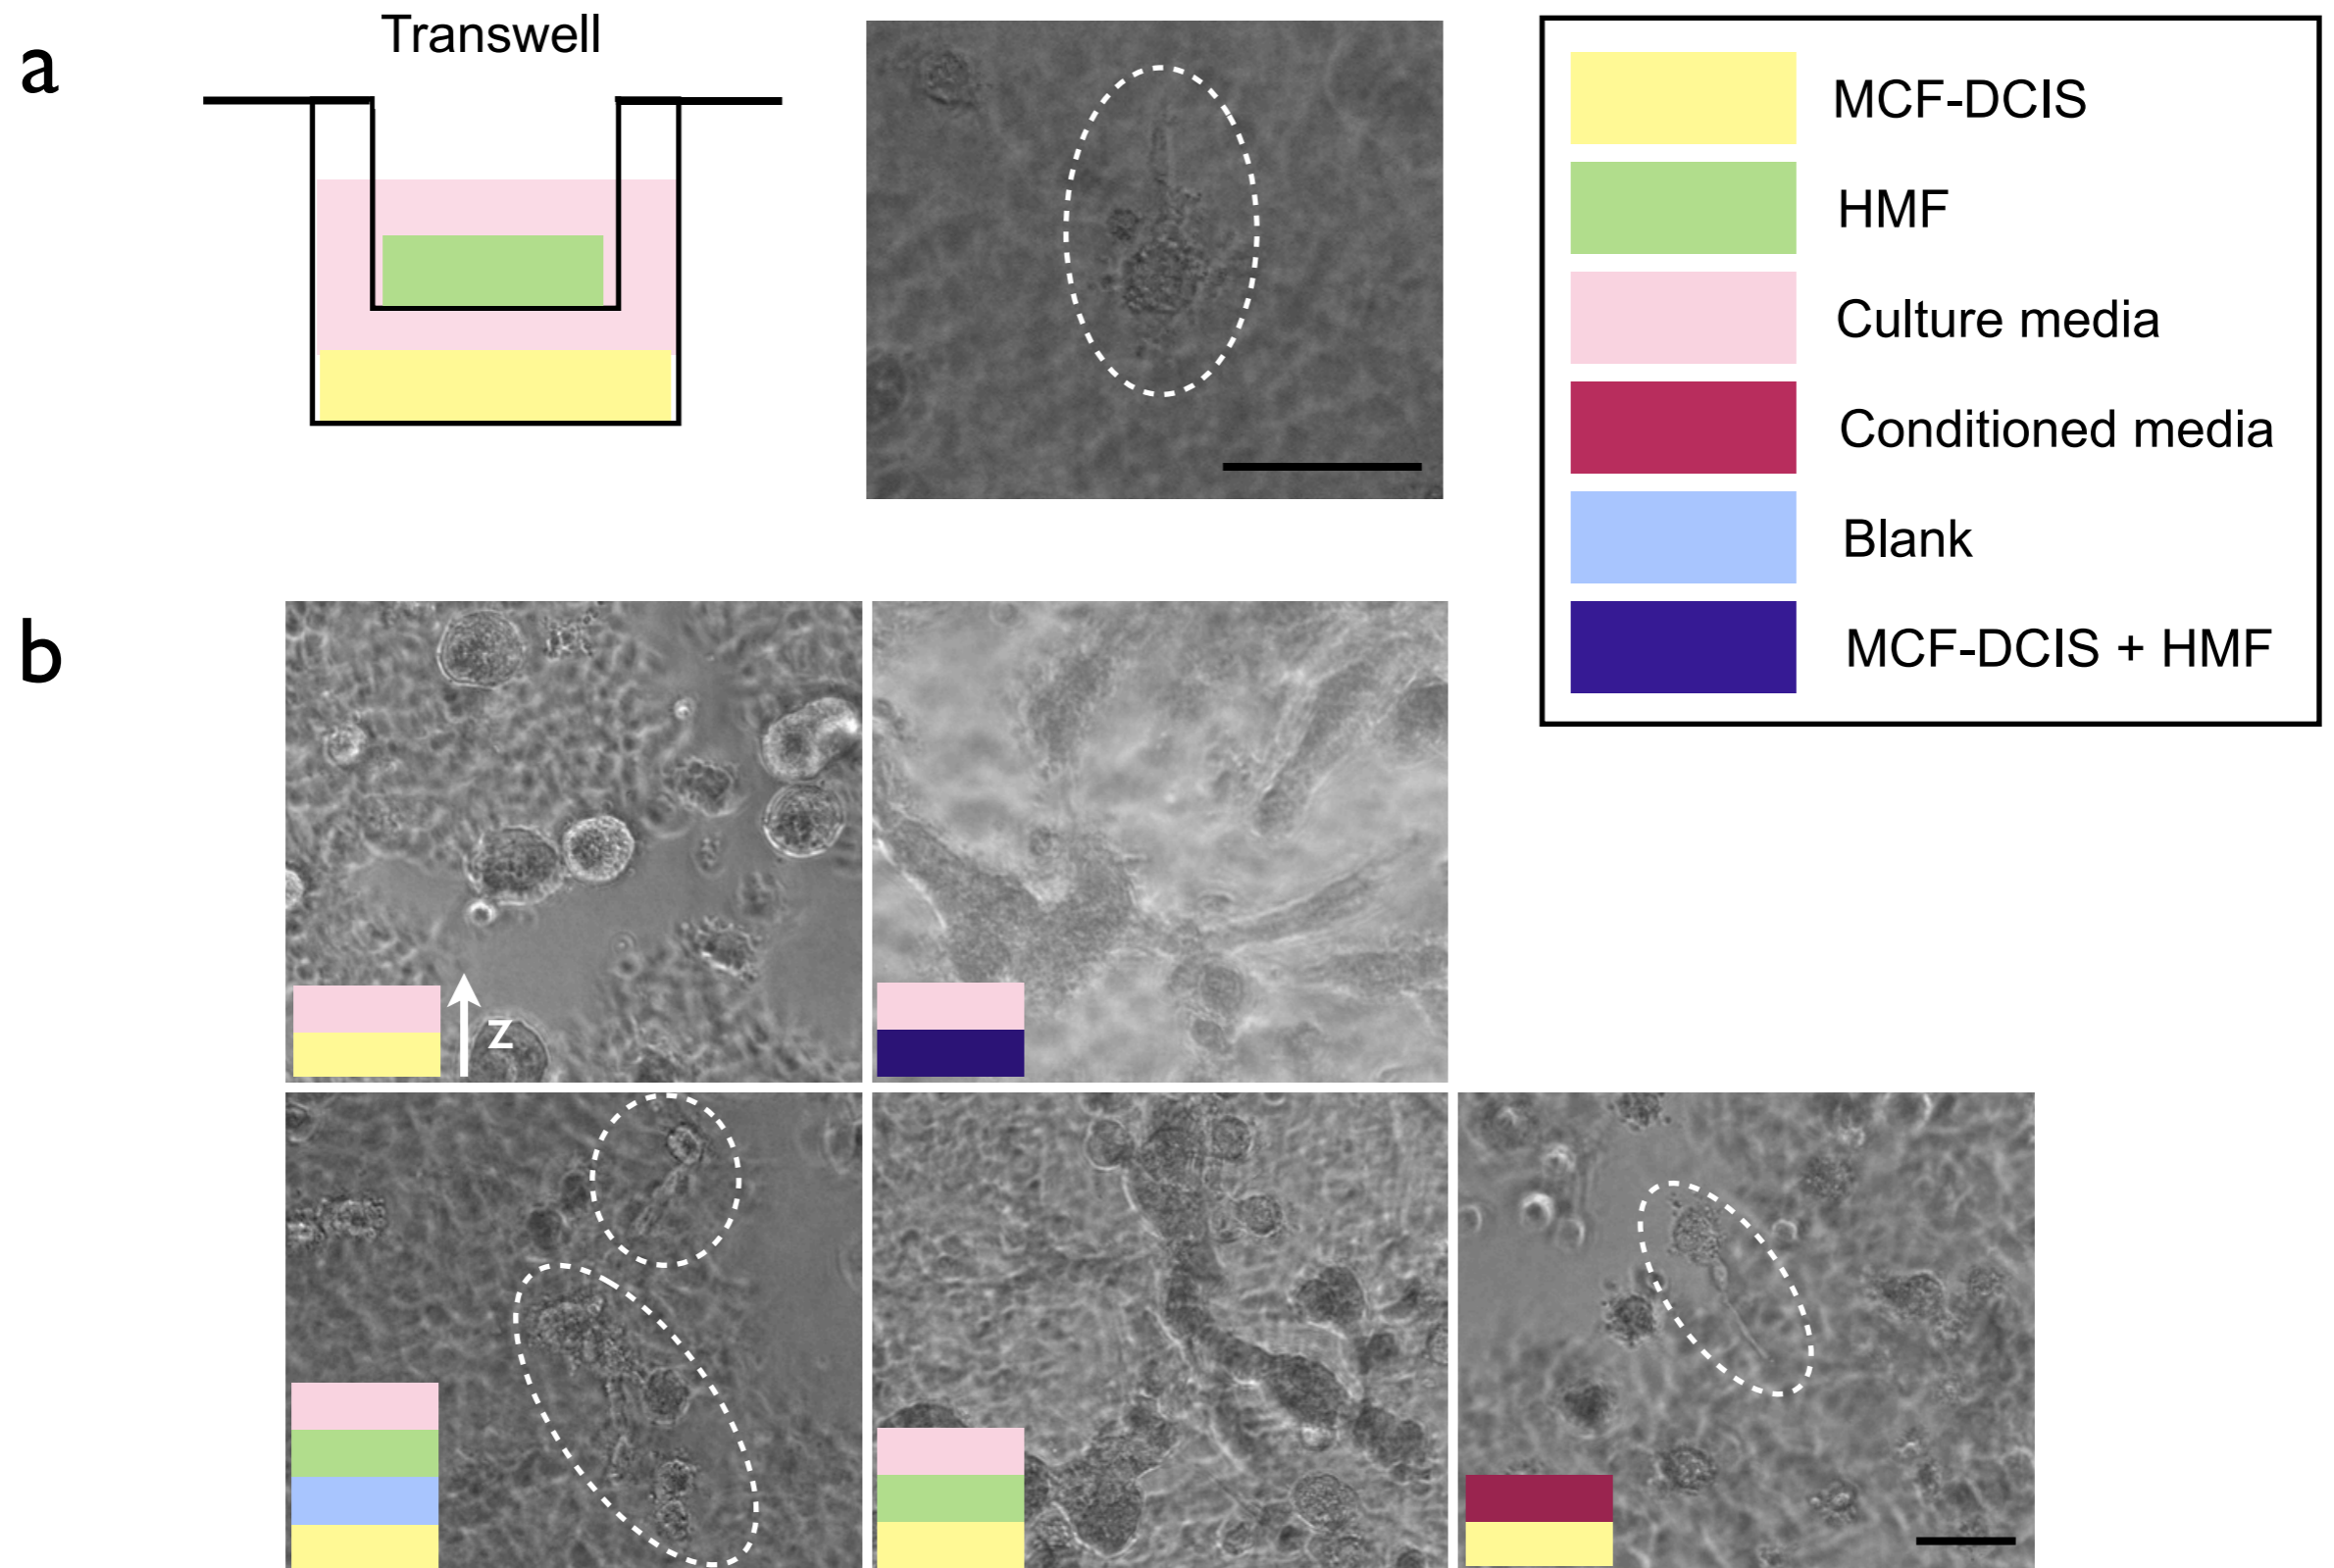

Fig S5.

Bright-field

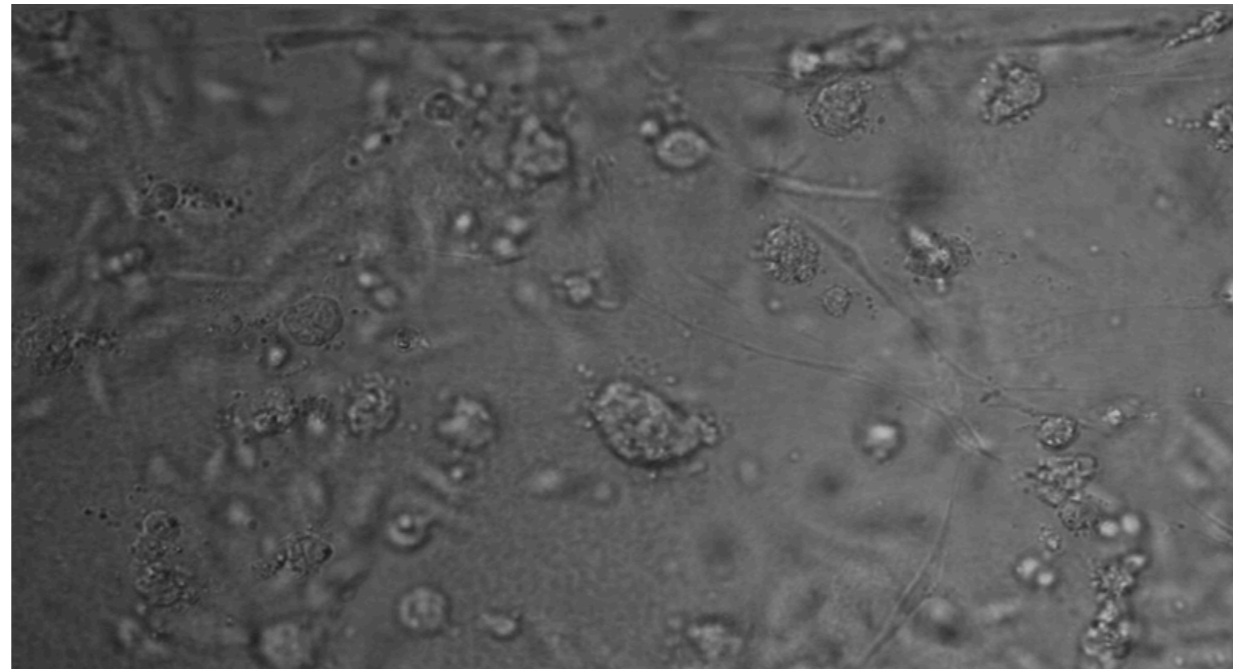

SHG

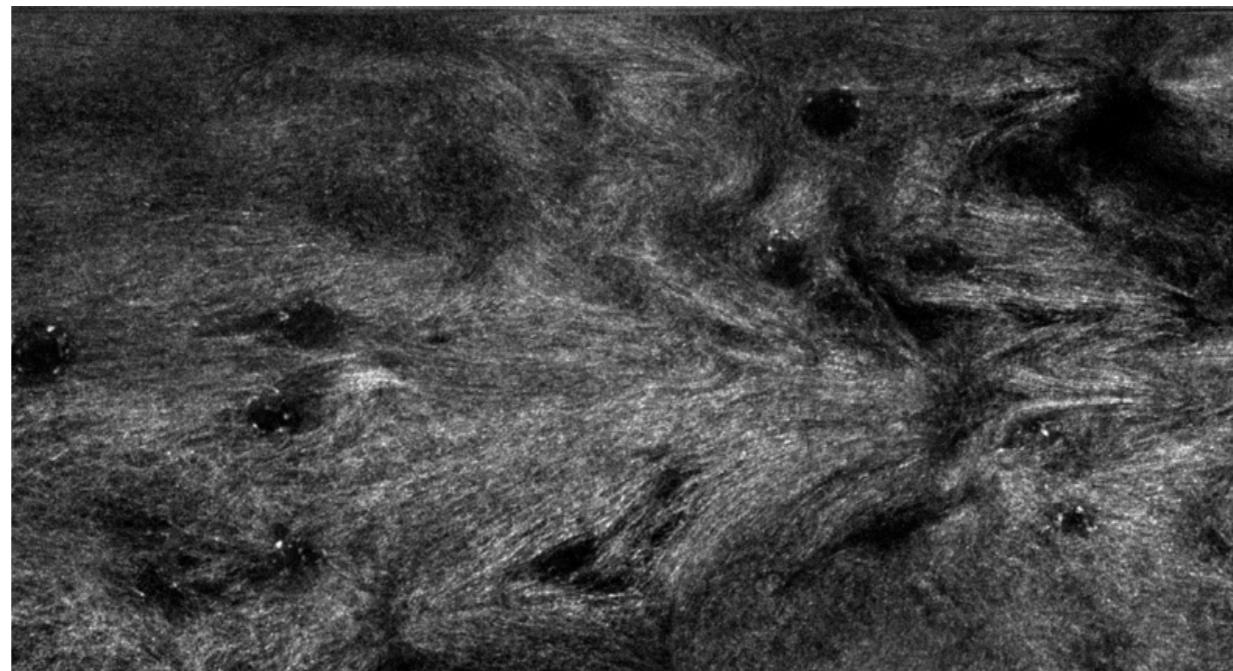

Fig S6.

**Day 1**

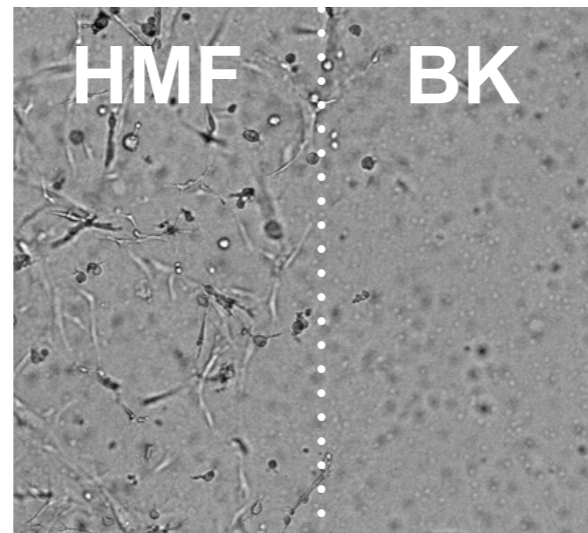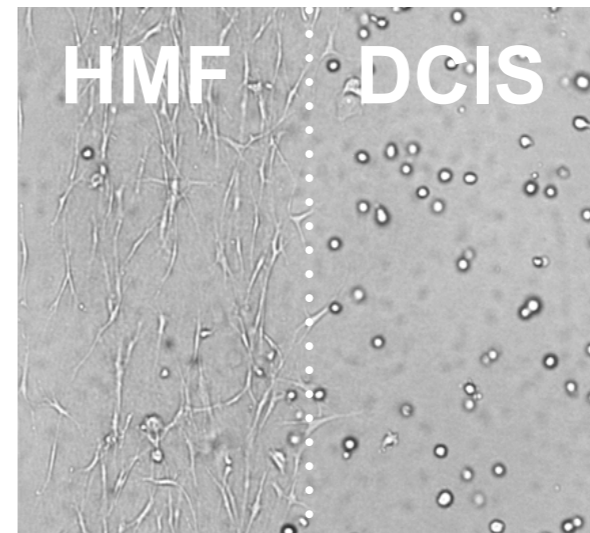

**Day 4**

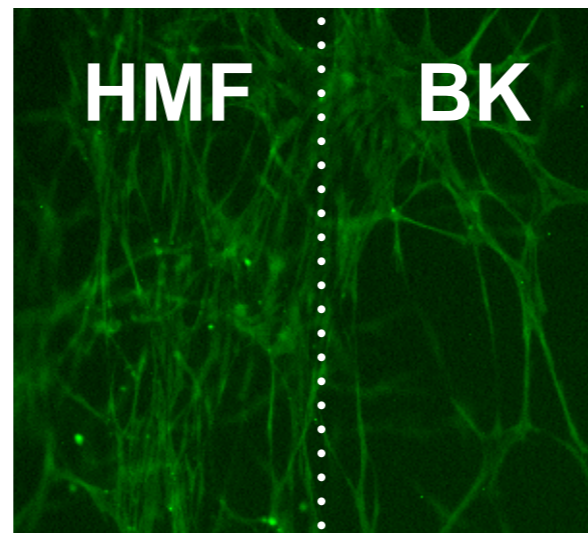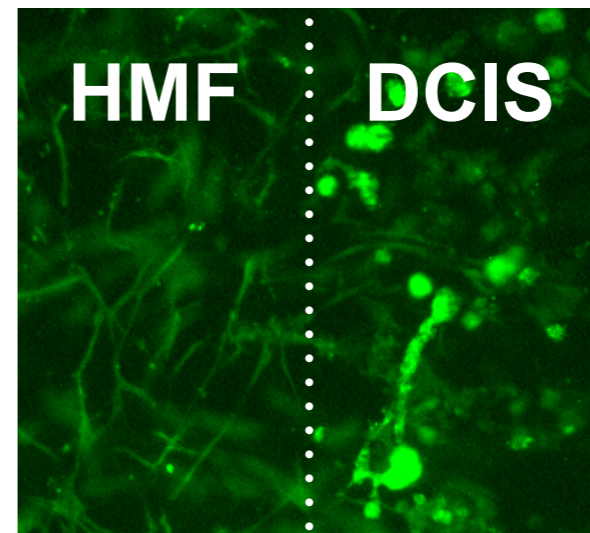

# Fig S7.

Collagen rearrangement associated with MCF-DCIS transition

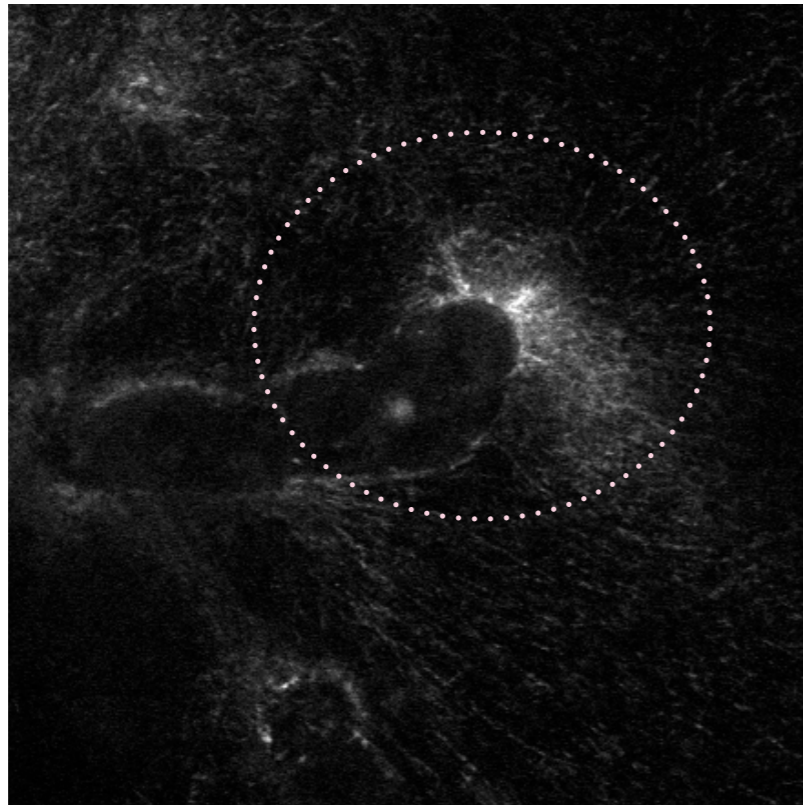

Collagen rearrangement associated with cell-to-cell contractile force

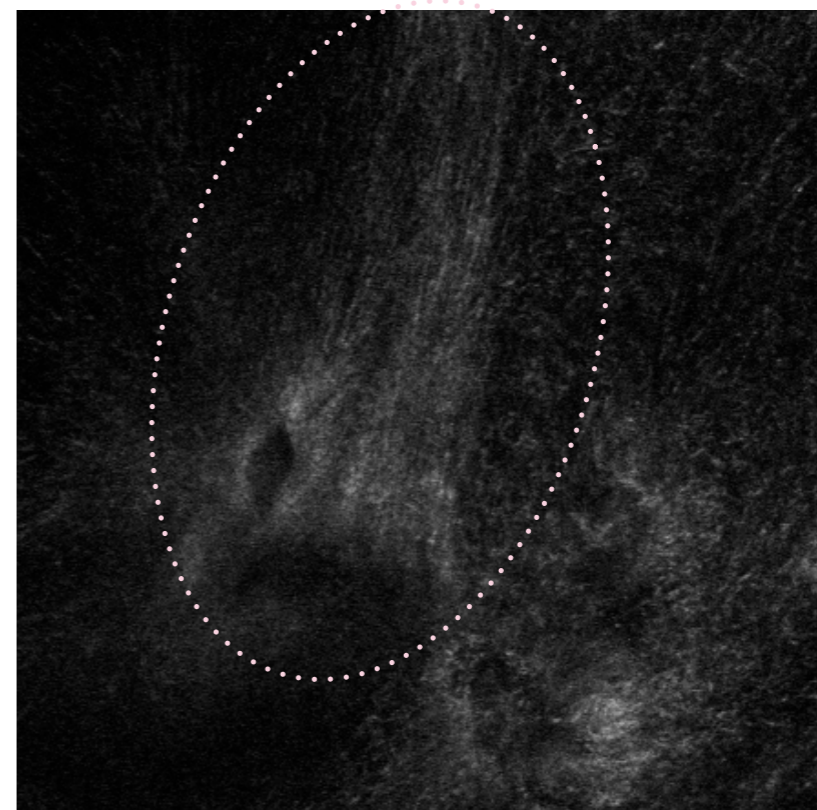

Fig S8 .

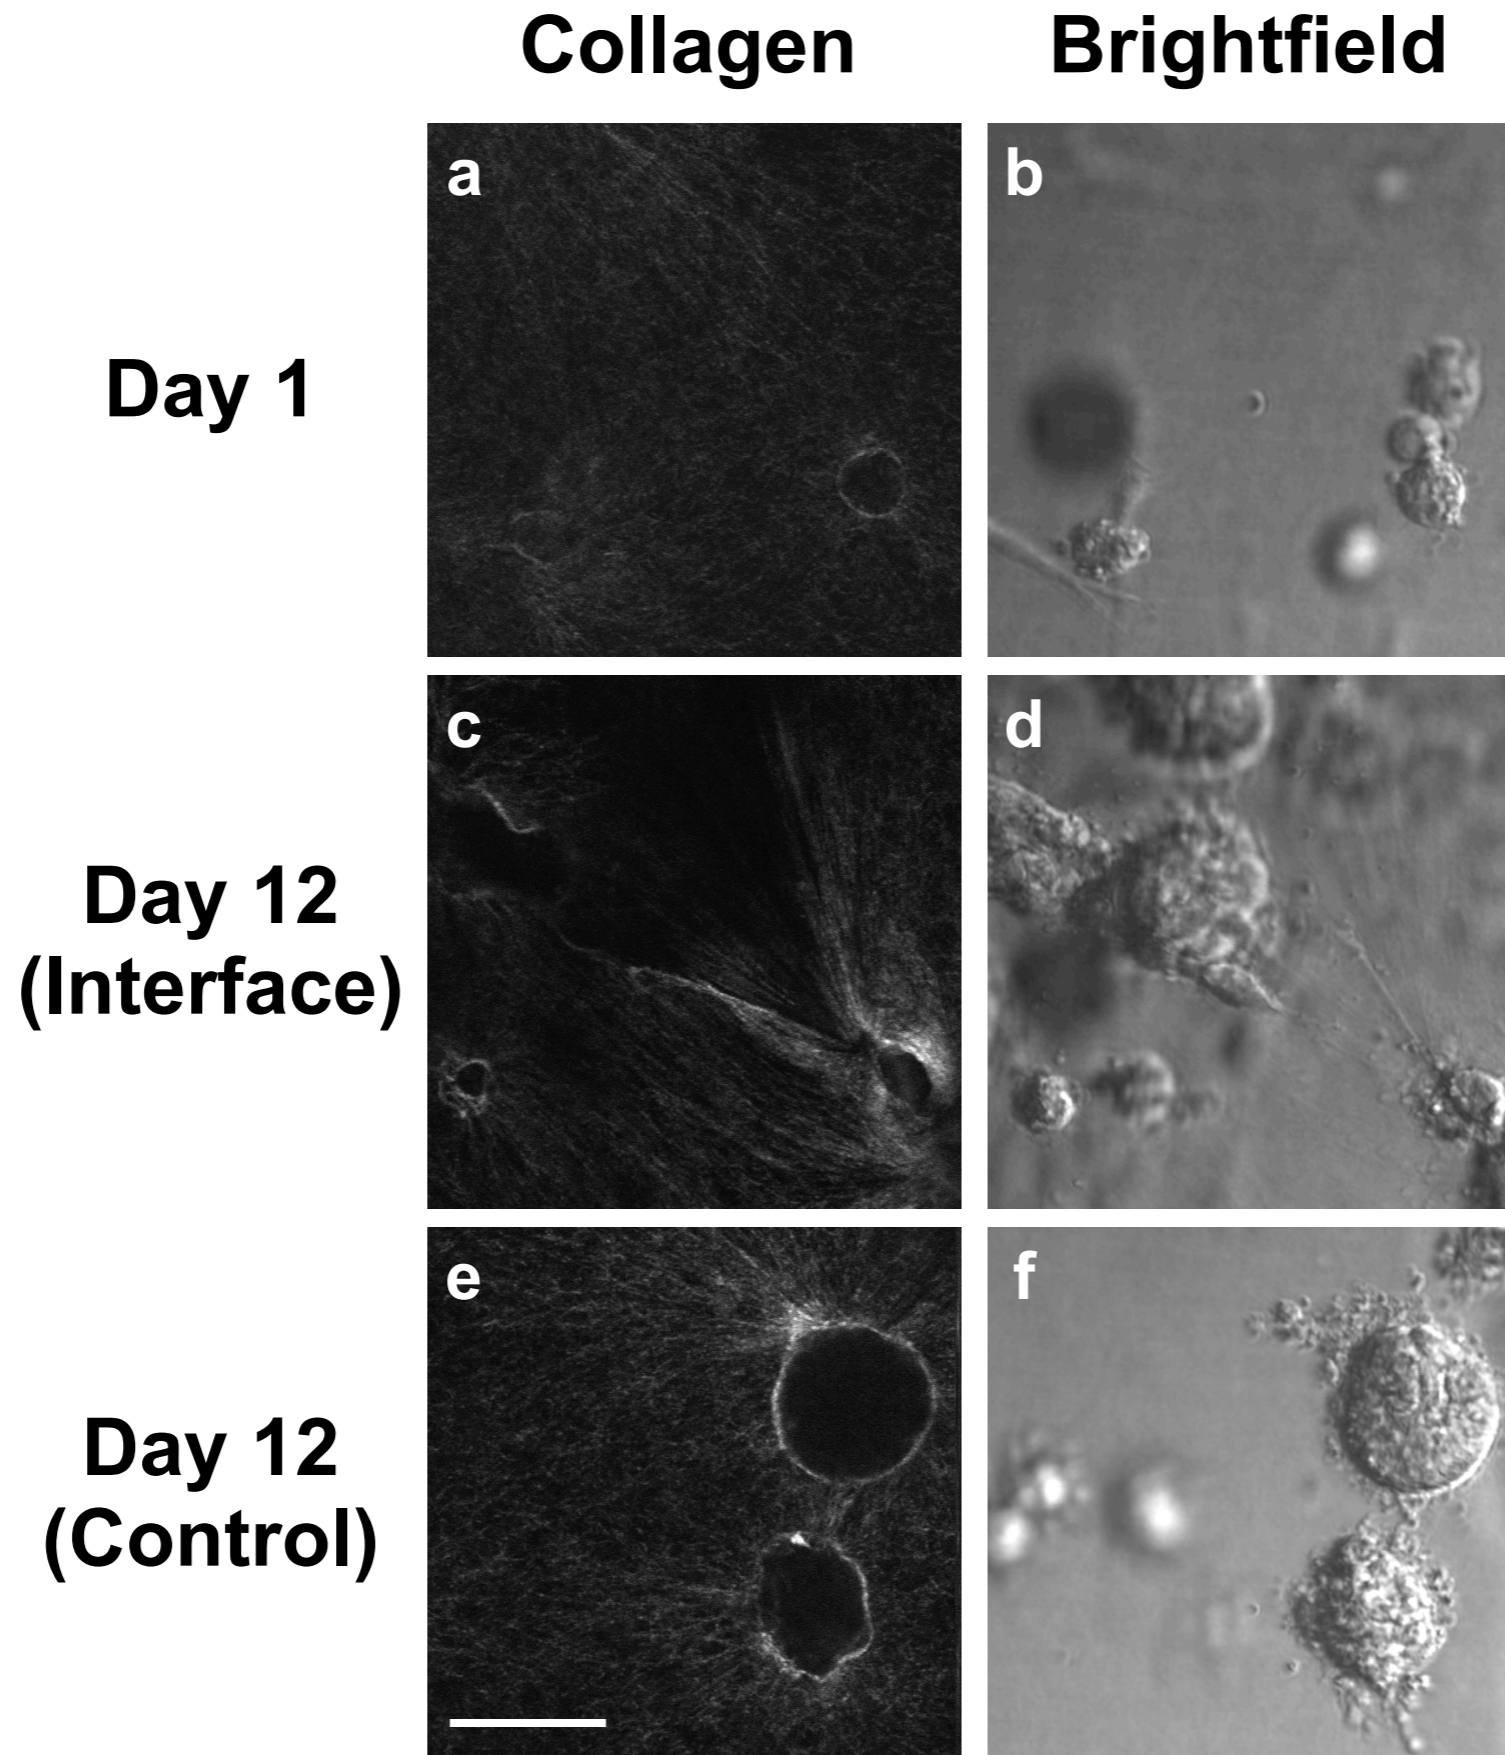



Fig S9 .

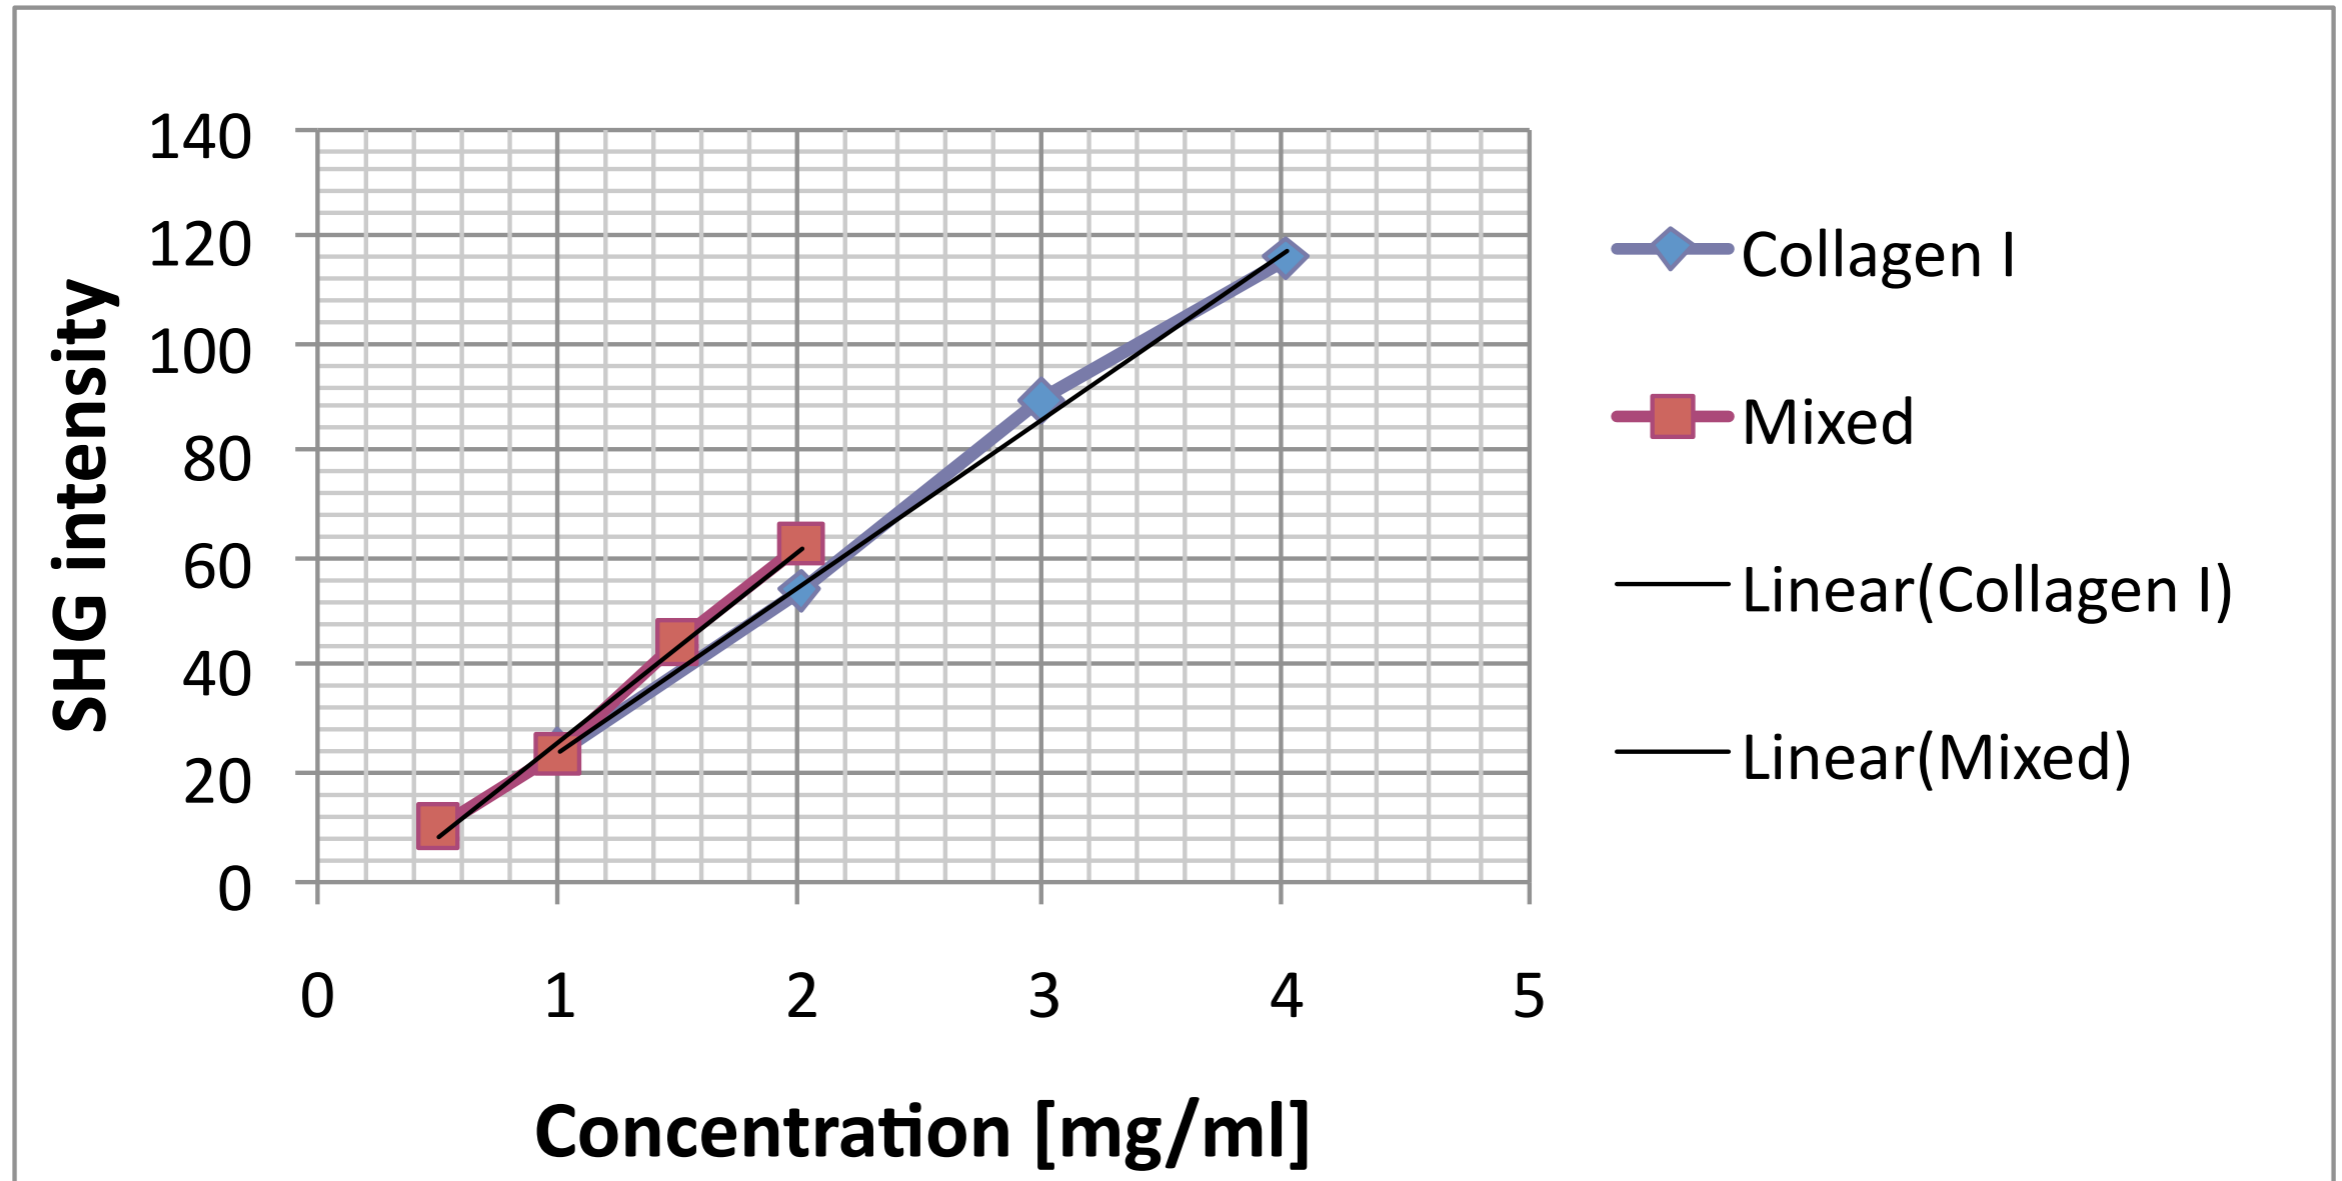

Supplement: NIHMS288000-supplement-fig__S1-S9.pdf [file NIHMS288000-supplement-fig__S1-S9.pdf]
